# Supplementary material
Source: PubMed Central journal article supplement (PMC4712108)
Supplement: NIHMS721638-supplement-Supp_TableS1___FigureS1.pdf [file NIHMS721638-supplement-Supp_TableS1___FigureS1.pdf]

Supplementary Figure 1

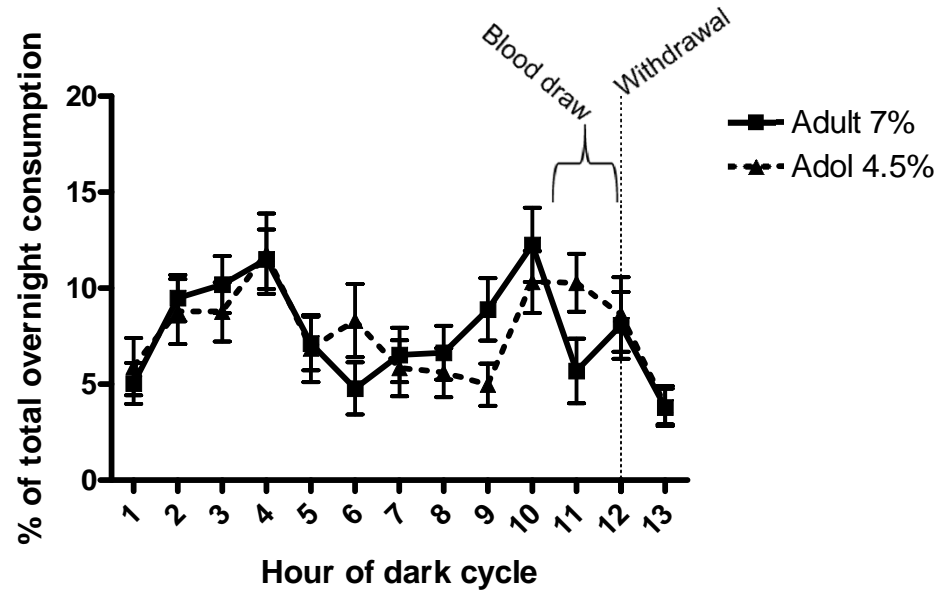

**Supplementary Table 1**

| Group   | Other measure                         | R value | P value |
|---------|---------------------------------------|---------|---------|
| Adol 7% | Blood alcohol level                   | .034    | .88     |
| Adol 7% | Alcohol consumed<br>(Ave 15 days)     | -.064   | .74     |
| Adol 7% | Alcohol consumed<br>(Ave last 5 days) | .036    | .85     |
| Adol 7% | Alcohol consumed<br>(day 15)          | -.072   | .71     |
| Adol 7% | Body weight at<br>end of study        | -.137   | .47     |

**Supplementary Table 1: CCL2 mRNA levels do not correlate with blood alcohol levels, alcohol consumed, and body weight within an age/alcohol dose group.** To determine the role of the blood alcohol level, alcohol consumed and body weight in the variability of the CCL2 mRNA response of the adolescents exposed to 7% CAD, each of these values was correlated to the CCL2 mRNA fold changes. None were found to correlate with the CCL2 response.

**Supplementary Figure 1: Adolescent Wistar rats show a dark cycle drinking pattern comparable to adult Wistar rats.** On the 13-14<sup>th</sup> night of the CAD paradigm, the amount of alcohol consumed at each hour of the dark cycle (7 pm to 7 am). Dashed line represents the end of the dark cycle and the time of withdrawal and/or tissue collection. Data presented as mean±SEM. N=18/group.

**Supplementary video:** Example of a clonic-tonic seizure in an adolescent rat exposed to 7% CAD. This rat had CCL2 mRNA levels at 95.8 fold change. Top trace shows EEG waveform from 3 seconds during seizure while bottom trace shows EEG waveform for 3 seconds during a nonseizure period.

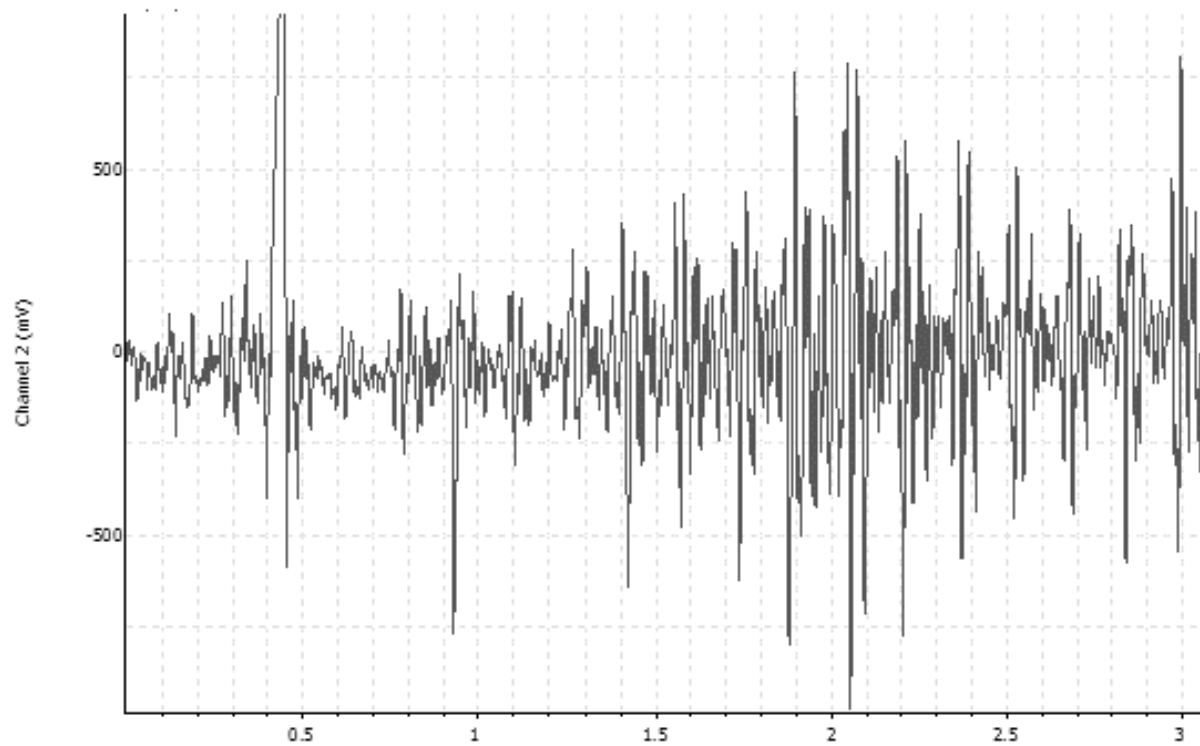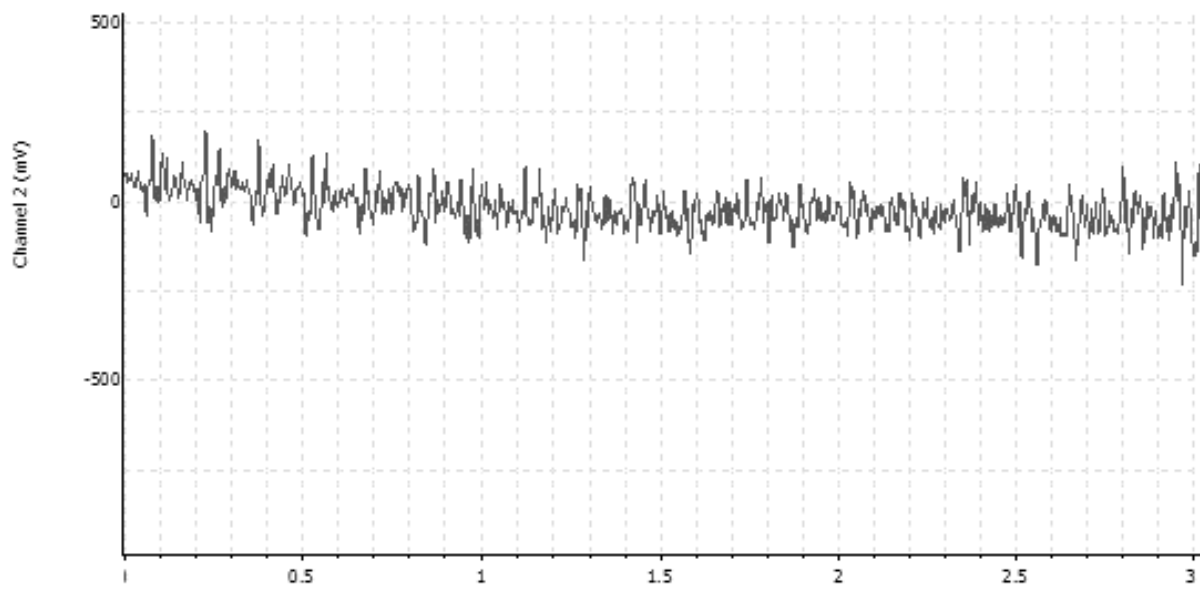

Supplementary Video
